# Supplementary material
Source: PubMed Central journal article supplement (PMC2857013)

Supplemental Figure 1. Microarray and Gene Set Enrichment Analysis (GSEA) for BCAA oxidation enzymes in adipose tissue of AG4OX and AG4KO mice.

Total RNA from epididymal adipose tissue was extracted using the RNeasy Mini Kit from Qiagen from three mice from each of four genotypes: aP2-Cre transgenic littermates (controls for AG4KO mice), AG4KO mice; FVB littermates (controls for AG4OX) and AG4OX. RNA from each mouse was hybridized on an Affymetrix MG-U74-A.v2 Genechip microarray. Genome-wide expression analysis of the microarray data was performed using gene set enrichment analysis (GSEA) software version 2.05 available from the Broad Institute (<http://www.broadinstitute.org/gsea/downloads.jsp>) {Subramanian, 2005 #59}. The version of the gene set database used was s2.mgu74av2.gmt. The gene set comprising the BCAA oxidation enzymes in this gene set database is entitled:

"MAP00280\_VALINE\_LEUCINE\_AND\_ISOLEUCINE\_DEGRADATION."

The analysis demonstrated the coordinate down-regulation of BCAA enzymes in AG4OX (Supplemental Figure 1A) adipose tissue and the coordinate upregulation of BCAA enzymes in AG4KO (Supplemental Figure 1B) adipose tissue. In the top panel of figures 1A and 1B, the Affymetrix Probe number, Gene Symbols, and Gene Names are listed for each gene included in BCAA oxidation gene set. 'Rank in Gene List' refers to the position of the gene in the ranked list of all genes present in our expression dataset. The 'Rank Metric Score' is the signal to noise ratio for each gene used to position the gene in the ranked list. The GSEA algorithm calculates an enrichment score reflecting the degree to which the genes included in a gene set are overrepresented at the top or bottom of the ranked list of all genes present in the expression dataset. The 'Running ES' is the enrichment score for this set at this point in the ranked list of genes. The final enrichment score for a set is the maximum running ES, or the maximum deviation from zero encountered for that set (as illustrated in the lower panel). A positive ES indicates gene set enrichment at the top of the ranked list; a negative ES indicates gene set enrichment at the bottom of the ranked list.

The Bottom panel of figures 1A and 1B provides a graphical representation of the 'Running ES' (top portion), the location of the BCAA genes in the ranked set of all genes (middle portion), and the distribution of the rank metric score across all genes present in the expression dataset (bottom portion).

Supplemental Figure 1A

Gene Set Enrichment Analysis of BCAA Oxidation Enzymes in AG4OX Adipose Tissue

| AFFYMETRIX PROBE | GENE SYMBOL         | GENE NAME                                                                                                                          | RANK IN GENE LIST | RANK METRIC SCORE | RUNNING ES |
|------------------|---------------------|------------------------------------------------------------------------------------------------------------------------------------|-------------------|-------------------|------------|
| 92845_at         | OXCT1               | 3-oxoacid CoA transferase 1                                                                                                        | 4                 | 1.91              | 0.13       |
| 94940_at         | MCCC1               | methylcrotonoyl-Coenzyme A carboxylase 1 (alpha)                                                                                   | 12                | 1.64              | 0.24       |
| 94325_at         | HMGCS1              | 3-hydroxy-3-methylglutaryl-Coenzyme A synthase 1                                                                                   | 30                | 1.23              | 0.32       |
| 104153_at        | IVD                 | isovaleryl coenzyme A dehydrogenase                                                                                                | 52                | 1.04              | 0.39       |
| 161997_f_at      | NULL                | NULL                                                                                                                               | 129               | 0.83              | 0.44       |
| 96058_s_at       | ALDH2               | aldehyde dehydrogenase 2, mitochondrial                                                                                            | 196               | 0.77              | 0.48       |
| 96057_at         | ALDH2               | aldehyde dehydrogenase 2, mitochondrial                                                                                            | 204               | 0.76              | 0.54       |
| 99571_at         | ACAA1B              | acetyl-Coenzyme A acyltransferase 1B                                                                                               | 346               | 0.68              | 0.57       |
| 160128_at        | PCCB                | propionyl Coenzyme A carboxylase, beta polypeptide                                                                                 | 402               | 0.65              | 0.61       |
| 160482_at        | ACAA1A              | acetyl-Coenzyme A acyltransferase 1A                                                                                               | 523               | 0.61              | 0.64       |
| 95426_at         | ECHS1               | enoyl Coenzyme A hydratase, short chain, 1, mitochondrial                                                                          | 561               | 0.60              | 0.68       |
| 97316_at         | EHHADH              | enoyl-Coenzyme A, hydratase/3-hydroxyacyl Coenzyme A dehydrogenase                                                                 | 1041              | 0.50              | 0.67       |
| 102302_at        | BCKDHB              | branched chain ketoacid dehydrogenase E1, beta polypeptide                                                                         | 1539              | 0.43              | 0.66       |
| 94324_f_at       | HMGCL               | 3-hydroxy-3-methylglutaryl-Coenzyme A lyase                                                                                        | 1584              | 0.42              | 0.69       |
| 102004_at        | ACAA1B              | acetyl-Coenzyme A acyltransferase 1B                                                                                               | 1595              | 0.42              | 0.71       |
| 92581_at         | ACADM               | acyl-Coenzyme A dehydrogenase, medium chain                                                                                        | 2141              | 0.37              | 0.70       |
| 92478_at         | STAG1               | stromal antigen 1                                                                                                                  | 3193              | 0.28              | 0.63       |
| 99613_at         | MUT                 | methylmalonyl-Coenzyme A mutase                                                                                                    | 3315              | 0.28              | 0.64       |
| 161970_f_at      | HMGCL               | 3-hydroxy-3-methylglutaryl-Coenzyme A lyase                                                                                        | 4025              | 0.22              | 0.60       |
| 103401_at        | ACADS               | acyl-Coenzyme A dehydrogenase, short chain                                                                                         | 4371              | 0.20              | 0.58       |
| 161401_f_at      | ALDH3A2             | aldehyde dehydrogenase family 3, subfamily A2                                                                                      | 5592              | 0.13              | 0.49       |
| 92590_at         | HMGCS2              | 3-hydroxy-3-methylglutaryl-Coenzyme A synthase 2                                                                                   | 5997              | 0.11              | 0.47       |
| 161469_r_at      | ACADS               | acyl-Coenzyme A dehydrogenase, short chain                                                                                         | 6589              | 0.07              | 0.42       |
| 99559_at         | ALDH3A2             | aldehyde dehydrogenase family 3, subfamily A2                                                                                      | 7013              | 0.05              | 0.39       |
| 104011_at        | AOX1                | aldehyde oxidase 1                                                                                                                 | 7743              | 0.01              | 0.34       |
| 96913_at         | HADHB /// LOC623031 | droxyacyl-Coenzyme A dehydrogenase/3-ketoacyl-Coenzyme A thiolase/enoyl-Coenzyme A hydratase (trifunctional protein), beta subunit | 8895              | -0.04             | 0.25       |
| 161956_at        | ALDH1A1             | aldehyde dehydrogenase family 1, subfamily A1                                                                                      | 10340             | -0.15             | 0.14       |
| 100068_at        | ALDH1A1             | aldehyde dehydrogenase family 1, subfamily A1                                                                                      | 11938             | -0.42             | 0.04       |

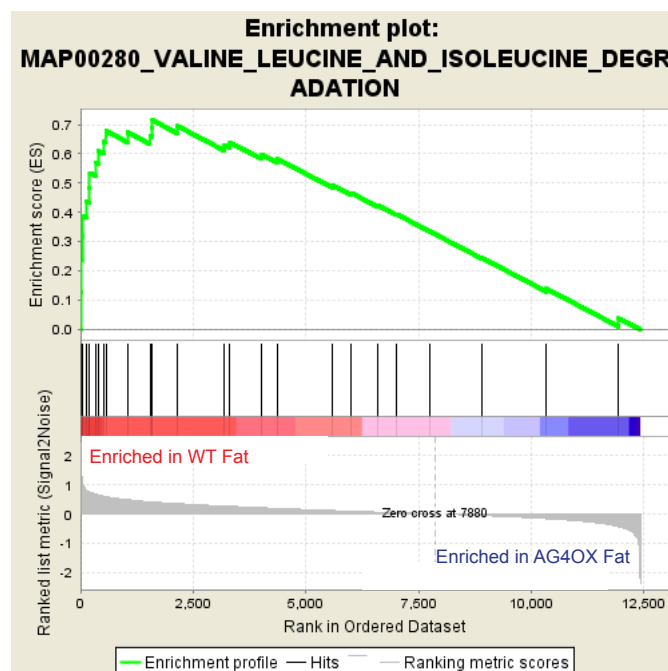

Supplemental Figure 1B

Gene Set Enrichment Analysis of BCAA Oxidation Enzymes in AG4KO Adipose Tissue

| AFFYMETRIX PROBE | GENE SYMBOL         | GENE NAME                                                                                                                          | RANK IN GENE LIST | RANK METRIC SCORE | RUNNING ES |
|------------------|---------------------|------------------------------------------------------------------------------------------------------------------------------------|-------------------|-------------------|------------|
| 161970_f_at      | HMGCL               | 3-hydroxy-3-methylglutaryl-Coenzyme A lyase                                                                                        | 880               | 0.36              | -0.04      |
| 161469_r_at      | ACADS               | acyl-Coenzyme A dehydrogenase, short chain                                                                                         | 3240              | 0.12              | -0.22      |
| 161401_f_at      | ALDH3A2             | aldehyde dehydrogenase family 3, subfamily A2                                                                                      | 3900              | 0.07              | -0.27      |
| 100068_at        | ALDH1A1             | aldehyde dehydrogenase family 1, subfamily A1                                                                                      | 4349              | 0.05              | -0.30      |
| 92478_at         | STAG1               | stromal antigen 1                                                                                                                  | 5902              | -0.04             | -0.42      |
| 96058_s_at       | ALDH2               | aldehyde dehydrogenase 2, mitochondrial                                                                                            | 7006              | -0.10             | -0.50      |
| 161997_f_at      | NULL                | NULL                                                                                                                               | 7457              | -0.12             | -0.52      |
| 96057_at         | ALDH2               | aldehyde dehydrogenase 2, mitochondrial                                                                                            | 7848              | -0.14             | -0.54      |
| 161956_at        | ALDH1A1             | aldehyde dehydrogenase family 1, subfamily A1                                                                                      | 7952              | -0.15             | -0.54      |
| 102302_at        | BCKDHB              | branched chain ketoacid dehydrogenase E1, beta polypeptide                                                                         | 8824              | -0.21             | -0.59      |
| 94324_f_at       | HMGCL               | 3-hydroxy-3-methylglutaryl-Coenzyme A lyase                                                                                        | 9430              | -0.25             | -0.62      |
| 160482_at        | ACAA1A              | acetyl-Coenzyme A acyltransferase 1A                                                                                               | 9805              | -0.28             | -0.62      |
| 99559_at         | ALDH3A2             | aldehyde dehydrogenase family 3, subfamily A2                                                                                      | 9870              | -0.28             | -0.60      |
| 95426_at         | ECHS1               | enoyl Coenzyme A hydratase, short chain, 1, mitochondrial                                                                          | 10632             | -0.35             | -0.63      |
| 103401_at        | ACADS               | acyl-Coenzyme A dehydrogenase, short chain                                                                                         | 11380             | -0.45             | -0.66      |
| 96913_at         | HADHB /// LOC623031 | droxyacyl-Coenzyme A dehydrogenase/3-ketoacyl-Coenzyme A thiolase/enoyl-Coenzyme A hydratase (trifunctional protein), beta subunit | 11587             | -0.49             | -0.63      |
| 99571_at         | ACAA1B              | acetyl-Coenzyme A acyltransferase 1B                                                                                               | 11690             | -0.51             | -0.59      |
| 160128_at        | PCCB                | propionyl Coenzyme A carboxylase, beta polypeptide                                                                                 | 11724             | -0.52             | -0.55      |
| 92590_at         | HMGCS2              | 3-hydroxy-3-methylglutaryl-Coenzyme A synthase 2                                                                                   | 11885             | -0.58             | -0.51      |
| 94940_at         | MCCC1               | methylcrotonoyl-Coenzyme A carboxylase 1 (alpha)                                                                                   | 12027             | -0.63             | -0.47      |
| 94325_at         | HMGCS1              | 3-hydroxy-3-methylglutaryl-Coenzyme A synthase 1                                                                                   | 12064             | -0.65             | -0.42      |
| 97316_at         | EHHADH              | enoyl-Coenzyme A, hydratase/3-hydroxyacyl Coenzyme A dehydrogenase                                                                 | 12084             | -0.66             | -0.36      |
| 99613_at         | MUT                 | methylmalonyl-Coenzyme A mutase                                                                                                    | 12090             | -0.66             | -0.30      |
| 92581_at         | ACADM               | acyl-Coenzyme A dehydrogenase, medium chain                                                                                        | 12123             | -0.68             | -0.25      |
| 92845_at         | OXCT1               | 3-oxoacid CoA transferase 1                                                                                                        | 12150             | -0.69             | -0.19      |
| 104153_at        | IVD                 | isovaleryl coenzyme A dehydrogenase                                                                                                | 12216             | -0.75             | -0.13      |
| 102004_at        | ACAA1B              | acetyl-Coenzyme A acyltransferase 1B                                                                                               | 12242             | -0.77             | -0.06      |
| 104011_at        | AOX1                | aldehyde oxidase 1                                                                                                                 | 12377             | -0.94             | 0.01       |

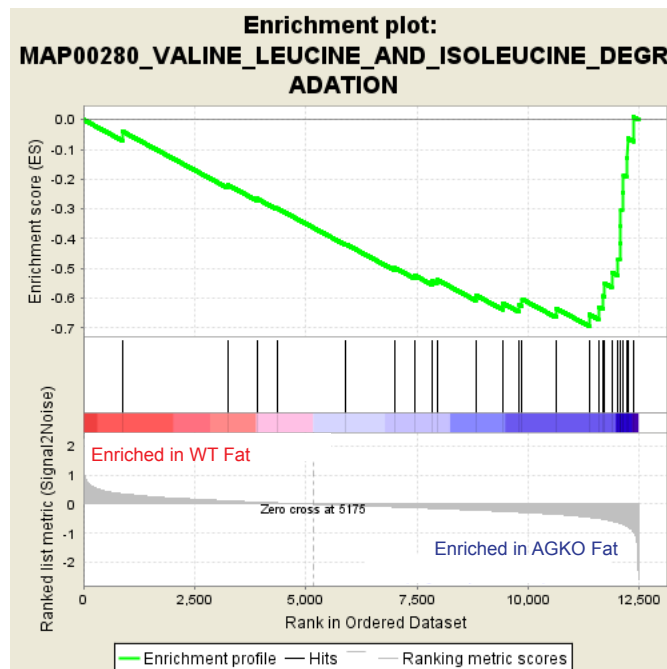

Supplement: supp_M109.075184_jbc.M109.075184-1.pdf [file supp_M109.075184_jbc.M109.075184-1.pdf]
